# Supplementary material
Source: ML conference proceedings conference paper supplement (https://openaccess.thecvf.com/content/CVPR_2019/html/Yi_MMFace_A_Multi-Metric_CVPR_2019_paper.html)
Supplement: Supplementary file 2 [file Yi_MMFace_A_Multi-Metric_CVPR_2019_supplemental.pdf]

# Supplementary Material for MMFace: A Multi-Metric Regression Network for Unconstrained Face Reconstruction

Hongwei Yi<sup>1\*</sup>, Chen Li<sup>2†</sup>, Qiong Cao<sup>2</sup>, Xiaoyong Shen<sup>2</sup>, Sheng Li<sup>3†</sup>, Guoping Wang<sup>3</sup>, Yu-Wing Tai<sup>2</sup>

<sup>1</sup>Shenzhen Graduate School, Peking Univ.      <sup>2</sup>Tencent

<sup>3</sup>School of Electronics Engineering and Computer Science, Peking Univ.

{hongweiyi, lisheng, wgp}@pku.edu.cn {chaselli, freyaqcao, dylanshen, yuwingtai}@tencent.com

Table 1. The specifications of the convolutional layers used in the parametric sub-network.

| 3D Conv |             | 3dConv1                            | 3dConv2                             | 3dConv3                             | 3dConv4                          | 3dConv5                           |
|---------|-------------|------------------------------------|-------------------------------------|-------------------------------------|----------------------------------|-----------------------------------|
|         | Input       | $1 \times 64 \times 64 \times 64$  | $64 \times 32 \times 32 \times 32$  | $128 \times 16 \times 16 \times 16$ | $256 \times 8 \times 8 \times 8$ | $512 \times 4 \times 4 \times 4$  |
|         | Output      | $64 \times 32 \times 32 \times 32$ | $128 \times 16 \times 16 \times 16$ | $256 \times 8 \times 8 \times 8$    | $512 \times 4 \times 4 \times 4$ | $1024 \times 1 \times 1 \times 1$ |
|         | Stride, Pad | 2, 1                               | 2, 1                                | 2, 1                                | 2, 1                             | 2, 0                              |
|         | Filter      | $4 \times 4 \times 4$              | $4 \times 4 \times 4$               | $4 \times 4 \times 4$               | $4 \times 4 \times 4$            | $4 \times 4 \times 4$             |
| FC      |             | $FC_{id/exp/p}^1$                  | $FC_{id}^2$                         | $FC_{exp}^2$                        | $FC_p^2$                         | $FC_{id}^3$                       |
|         | Input       | 1024                               | 512                                 | 512                                 | 512                              | 256                               |
|         | Output      | 512                                | 256                                 | 29                                  | 7                                | 199                               |

## 1. Network Architecture

Our method takes a facial image (cropped and scaled to  $256 \times 256$ ) as input and estimates the corresponding 3D volume  $\mathbb{V}$  and the 3DMM parameters  $\mathbf{p} = [\mathbf{f}, \mathbf{r}, \mathbf{t}, \alpha_{id}, \alpha_{exp}]^T$ . It consists of two cascade sub-networks, namely the volumetric sub-network VMN and the parametric sub-network PMN.

The VMN has the same architecture with VRN [1] except an additional upsampling layer to regress the 3D volume in a different resolution. Two identical ‘‘hourglass’’ modules are stacked together to extract a  $64 \times 64 \times 64$  feature map from the input image. In order to regress the 3D volumetric  $\mathbb{V}$  in different resolutions, we first extend the channel of this feature map to the target resolution  $r$  as  $64 \times 64 \times r$  and then employ one 2D upsample layer to estimate  $\mathbb{V}$  in the  $r \times r \times r$  resolution. Specifically, we use  $r = \{64, 128, 192\}$  in our implementation.

The PMN takes the  $64 \times 64 \times 64$  feature map of the VMN as input and estimates the corresponding 3DMM parameters  $\mathbf{p}$ . The specifications of the convolutional layers used in the PMN is illustrated in Table. 1.

## 2. VMN Evaluation and Results

Our multi-metric regression network not only estimates accurate 3DMM parameters, but also improves the intermediate volumetric geometry in turn by incorporating the parametric loss. A quantitative evaluation with VRN [1] by

<sup>1</sup>This work was done while Hongwei Yi was an intern at Tencent.

<sup>2</sup>Chen Li and Sheng Li are the joint corresponding authors.

Table 2. The quantitative evaluation of volumetric regression.

| Method         | AFLW2000-3D [2] |
|----------------|-----------------|
| VRN [1]        | 3.39%           |
| MMFace-ICP-192 | <b>3.13%</b>    |
| MMFace-ICP-128 | 3.26%           |
| MMFace-ICP-64  | 3.47%           |

counting the voxel mismatching percentage between reconstructed volume and ground truth is listed in Table. 2. Some qualitative comparison are also shown in Fig. 1. Because VRN [1] has already estimated very accurate volumetric geometry, visually improvements such as producing more details or reducing artifacts change the quantitative evaluation little and Table. 2 demonstrates our result is slightly better than VMN. However, it is clear to see our results in Fig. 1 are visually more pleasing. The detailed structures around nose and mouth are reconstructed better in our results.

## 3. Additional Results

We present more results of static images on AFLW2000-3D [2] in Fig. 2-Fig. 4.

## References

- [1] Aaron S. Jackson, Adrian Bulat, Vasileios Argyriou, and Georgios Tzimiropoulos. Large pose 3d face reconstruction from a single image via direct volumetric cnn regression. In *ICCV*, 2017. 1, 2
- [2] Xiangyu Zhu, Zhen Lei, Xiaoming Liu, Hailin Shi, and Stan Z. Li. Face alignment across large poses: A 3d solution. In *CVPR*, 2016. 1, 2, 3, 4

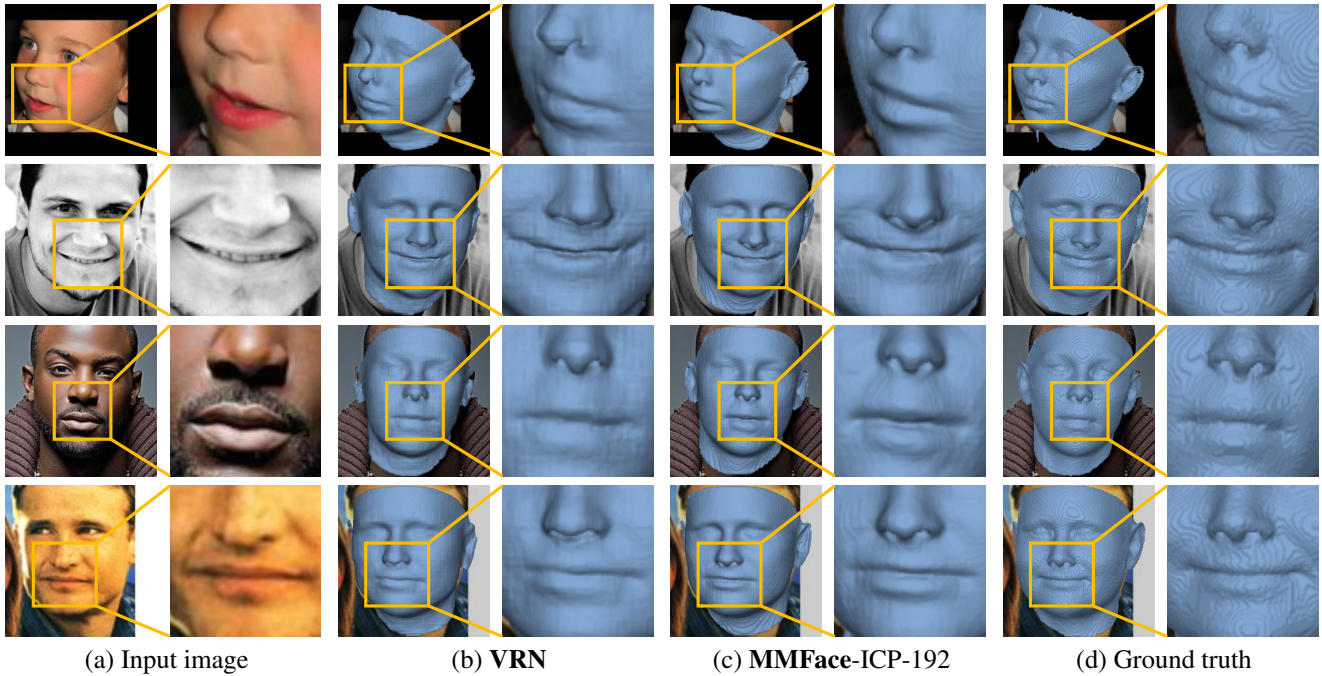

Figure 1. Comparison with VRN [1]. (a) The input image. (b-d) The result and close-up views of VRN, our MMFace-ICP-192 and the ground truth. Close-up views for better visualization are aligned right to their corresponding results.

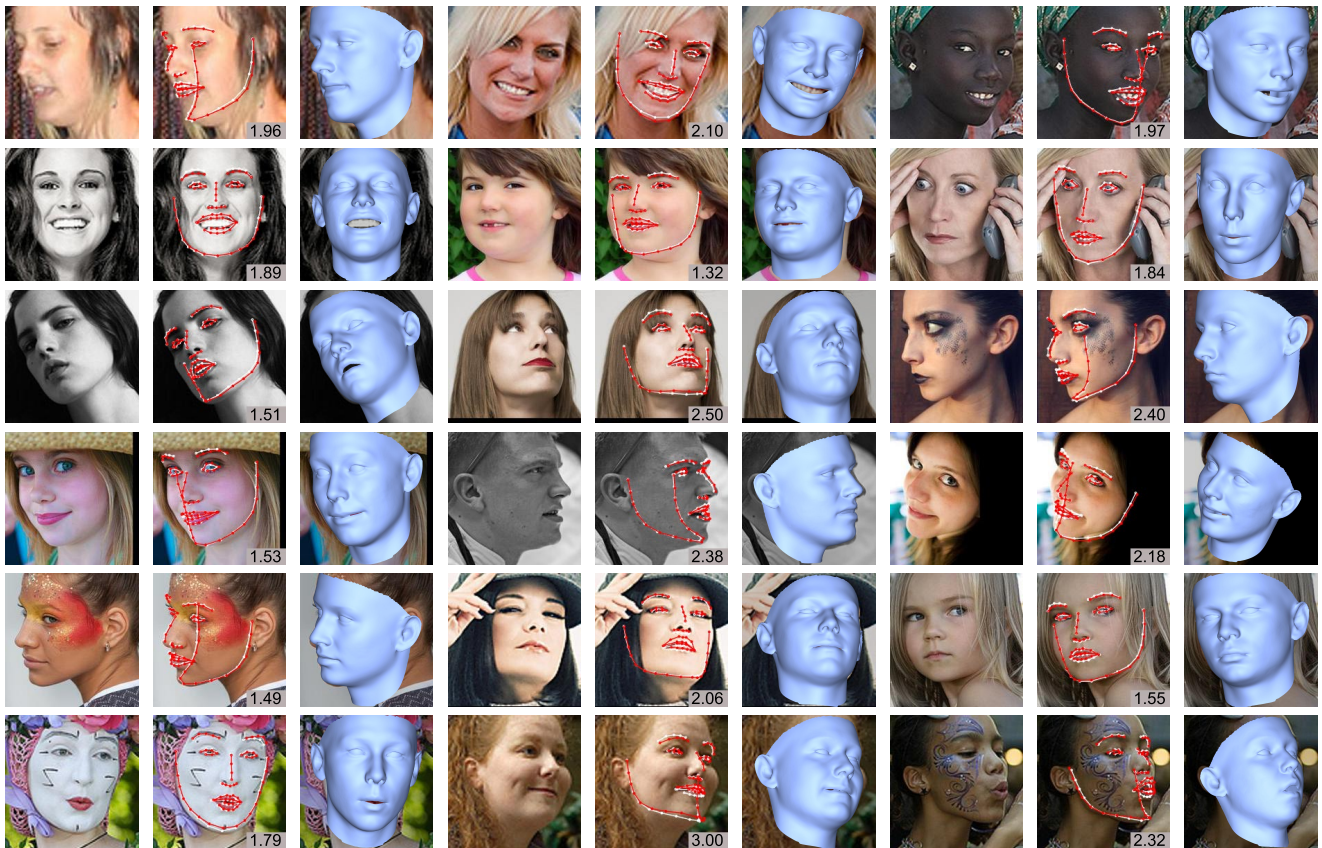

Figure 2. Face reconstruction and alignment results of our method on AFLW2000-3D [2].



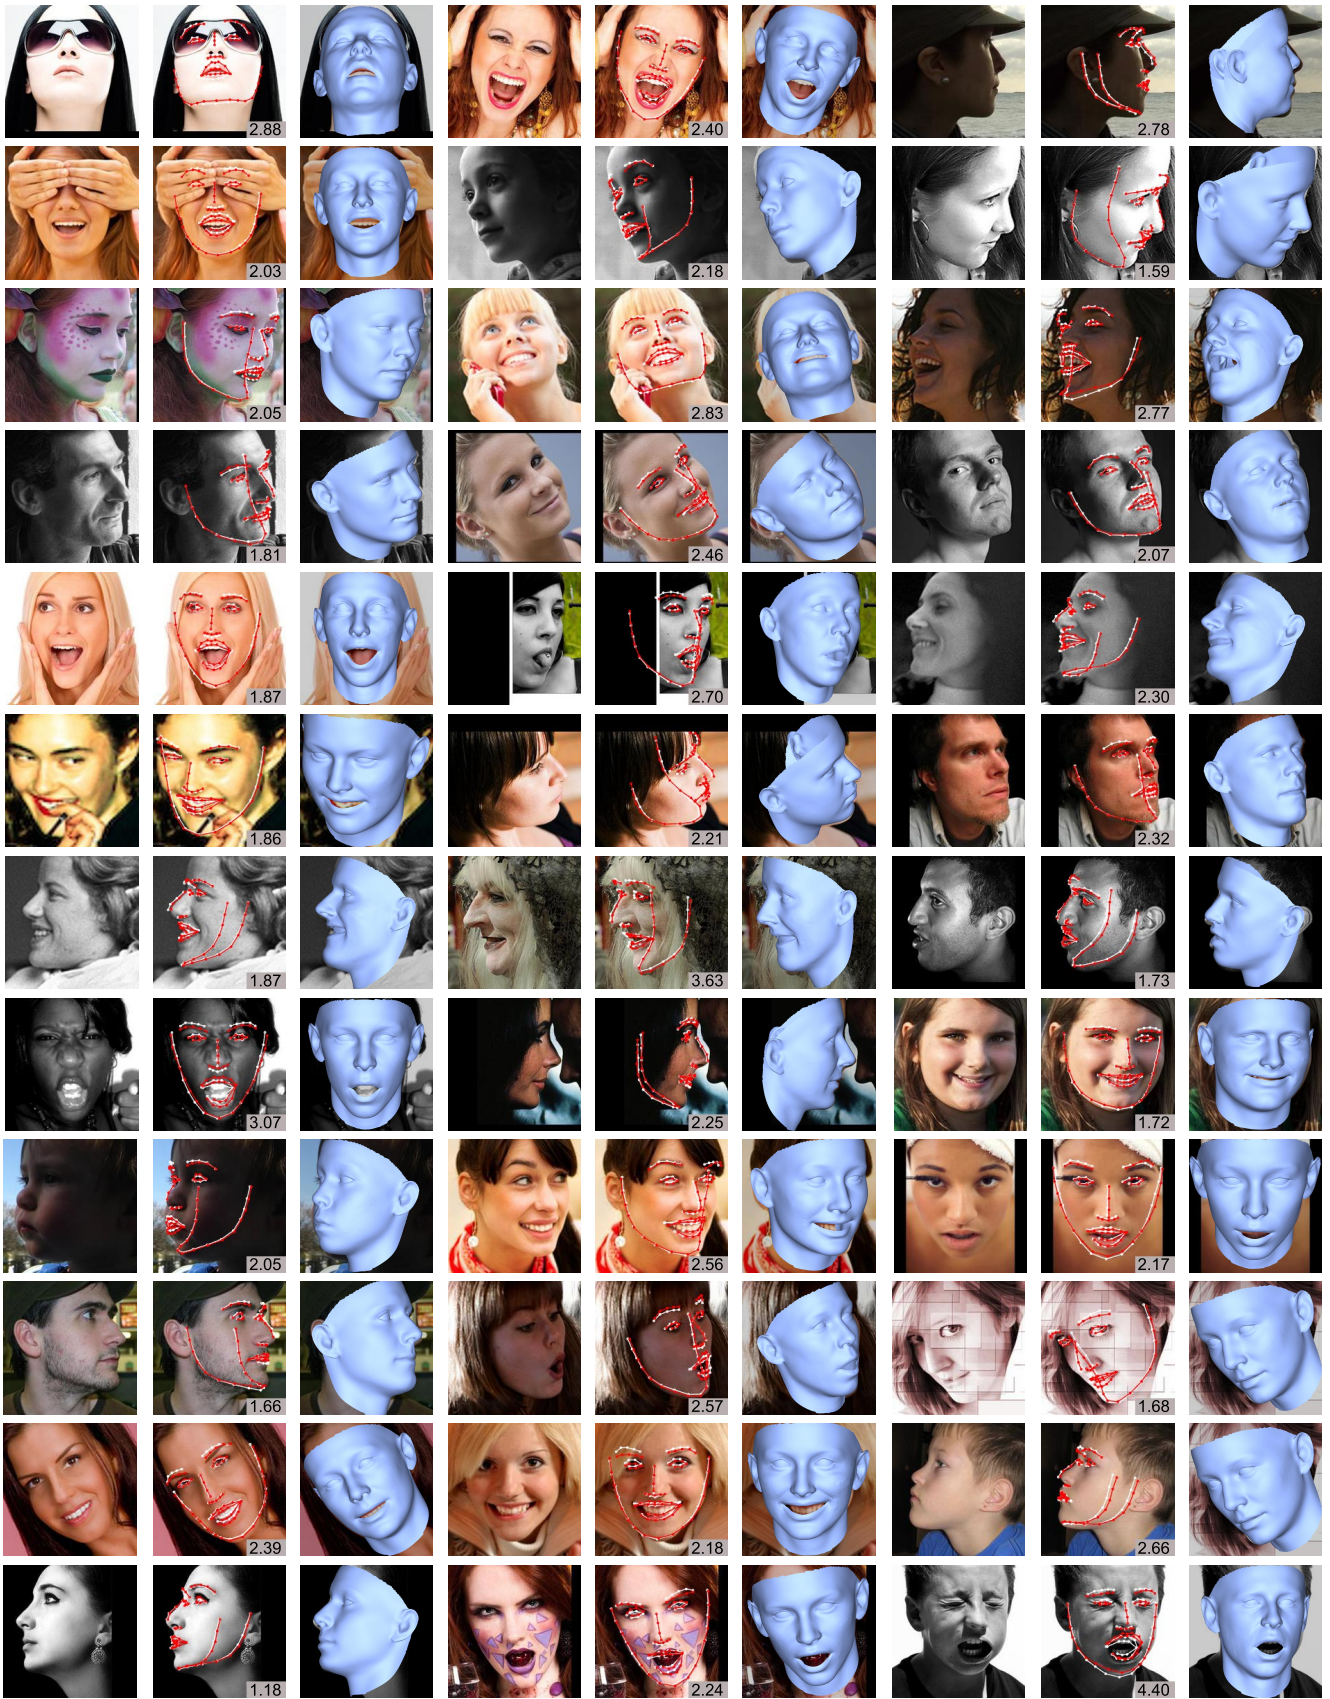

Figure 3. Face reconstruction and alignment results of our method on AFLW2000-3D [2].



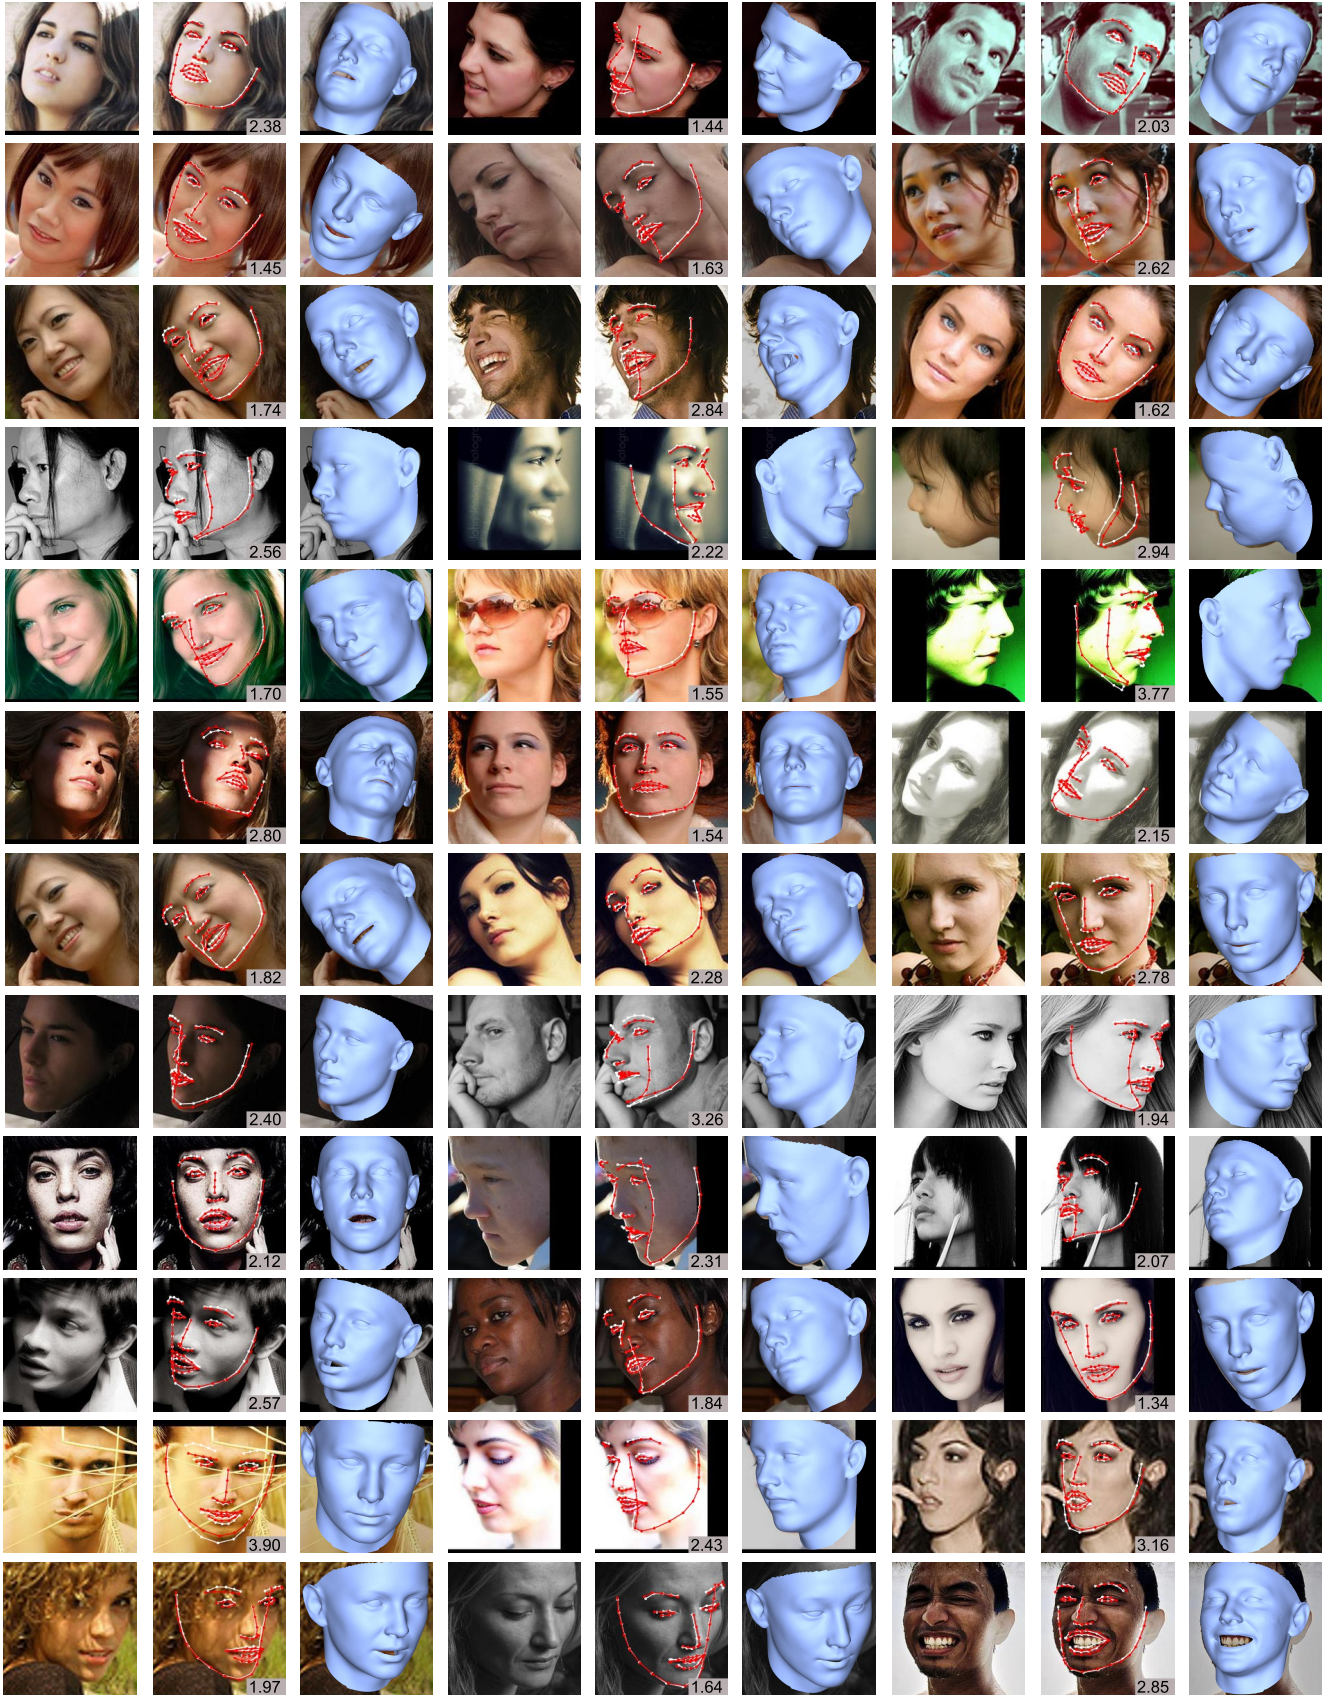

Figure 4. Face reconstruction and alignment results of our method on AFLW2000-3D [2].
